# Supplementary material for: Revealing Drought Tolerance Strategies in Pistachio Clonal Hybrids: Role of Osmotic Adjustment
Source: Research Square preprint supplement (doi:10.21203/rs.3.rs-5905176/v1), 2025-03-31
Supplement: Supplementary file 1 [file f3eb8fb8cbff8946e53c7bc4.xlsx]

## Sheet: Supplementary table 1
												Table 1. Analysis of variance for stomatal indices and leaf temperature in pistachio clonal hybrids under mild stress.
							Mean squares				df	Source of variation
					Stomata density	Stomata width	Stomata length	Pore length	Pore aperture	Leaf tempreture
					10678.81ns	0.155ns	0.147ns	0.100ns	0.101ns	0.42ns	6	Clonal hybrid (C)
					31106.33ns	0.0008ns	0.0288ns	0.0955ns	0.0755ns	0.230ns	1	Irrigation (I)
					1065.2ns	0.213ns	0.380ns	0.275ns	0.175ns	0.245ns	2	Block
					11678.81ns	0.0785ns	0.258ns	0.273ns	0.173ns	0.210ns	6	C*I
					120.36	0.26	0.254	0.456	0.356	0.713	26	Error
					10.32	8.34	2.58	4.76	6.69	3.36		Cv (%)
												ns: non-significantly differences.

## Sheet: Supplementary table 2
													Table 2. Analysis of variance for stomatal indices and leaf temperature in pistachio clonal hybrids under severity stress.
								Mean squares				df	Source of variation
						Stomata density	Stomata width	Stomata length	Pore length	Pore aperture	Leaf tempreture
						12568.71ns	0.253ns	0.149ns	0.271ns	0.201ns	0.478ns	6	Clonal hybrid (C)
						21107.23ns	0.0179ns	0.0035ns	0.412ns	0.345ns	0.298ns	1	Irrigation (I)
						1065.6ns	0.389ns	0.472ns	0.146ns	0.022ns	0.284ns	2	Block
						10678.71ns	0.225ns	0.275ns	0.142ns	0.0268ns	0.246ns	6	C*I
						104.36	0.344	0.273	1.7	0.038	0.732	26	Error
						9.35	7.4	2.75	5.23	6.007	3.29		Cv (%)
													ns: non-significantly differences.

## Sheet: Supplementary table 3
												Table 3. Analysis of variance for stomatal indices and leaf temperature in pistachio clonal hybrids under recovery stage.
							Mean squares				df	Source of variation
					Stomata density	Stomata width	Stomata length	Pore length	Pore aperture	Leaf tempreture
					10568.71ns	0.125ns	0.158ns	0.252ns	0.02ns	0.446ns	6	Clonal hybrid (C)
					25106.25ns	0.0164ns	0.0055ns	0.312ns	0.347ns	0.099ns	1	Irrigation (I)
					1043.6ns	0.289ns	0.372ns	0.246ns	0.0219ns	0.329ns	2	Block
					11678.71ns	0.125ns	0.175ns	0.133ns	0.0260ns	0.223ns	6	C*I
					132.36	0.244	0.144	1.65	0.0376	0.7	26	Error
					9.55	7.52	2.83	6.24	4.62	3.03		Cv (%)
												ns: non-significantly differences.
